# Supplementary material for: SF3A1 and pancreatic cancer: new evidence for the association of the spliceosome and cancer
Source: PubMed Central journal article supplement (PMC4741962; doi:10.18632/oncotarget.5647), 2015-10-15
Supplement: oncotarget-06-37750-s001.pdf [file oncotarget-06-37750-s001.pdf]

## SUPPLEMENTARY FIGURE AND TABLES

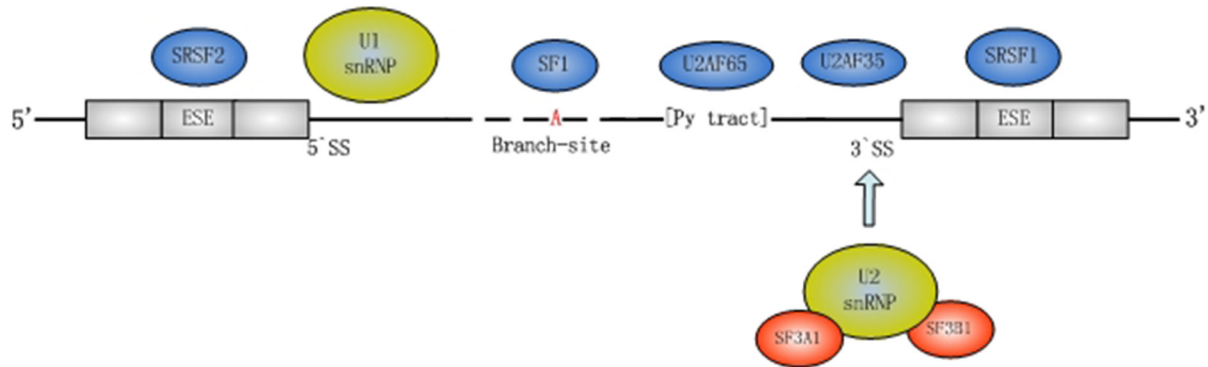

**Supplementary Figure S1: The major components of the U2-dependent spliceosome.** The U2-dependent intron recognition is initiated by the recruitment of U1 snRNP to the 5'SS. SF1 binds the branch-site A residue. The larger subunit of U2 snRNP auxiliary factor (U2AF), U2AF65, recognizes the downstream polypyrimidine tract (Py tract) of the branch site while the smaller subunit, U2AF35, binds to the AG dinucleotide of the 3'SS. U2 snRNP is recruited to the 3'SS with the help of SF3A1 and SF3B1. The SR proteins, such as SRSF1 and SRSF2, can bind to exonic splicing enhancers (ESEs) through the RS domain and help the recruiting of U1 snRNP and U2AF to the 5' or 3'SS

**Supplementary Table S1: Information on the 17 SNPs from six candidate spliceosome genes in the screening stage**

| Gene symbol    | rsID       | Position       | Alleles | MAF | <i>P</i> for HWE | FDR- <i>P</i> for HWE <sup>a</sup> |
|----------------|------------|----------------|---------|-----|------------------|------------------------------------|
| <i>PRPF40B</i> | rs4073998  | chr12 50038292 | A/G     | A   | 0.848            | 1                                  |
| <i>PRPF40B</i> | rs8626     | chr12 50034668 | A/G     | G   | 0.966            | 1                                  |
| <i>SF1</i>     | rs11231868 | chr11 64543901 | A/G     | G   | 0                | < 0.001                            |
| <i>SF1</i>     | rs474707   | chr11 64544135 | C/T     | T   | 0.848            | 1                                  |
| <i>SF3A1</i>   | rs12484880 | chr22 30751453 | G/T     | G   | 1                | 1                                  |
| <i>SF3A1</i>   | rs2074733  | chr22 30738587 | C/T     | T   | 0.698            | 1                                  |
| <i>SF3A1</i>   | rs5749066  | chr22 30736911 | A/G     | G   | 0                | < 0.001                            |
| <i>SF3A1</i>   | rs5749068  | chr22 30737015 | C/T     | T   | 0                | < 0.001                            |
| <i>SF3A1</i>   | rs5753081  | chr22 30740653 | C/T     | T   | 0.771            | 1                                  |
| <i>SF3A1</i>   | rs5994293  | chr22 30752696 | G/T     | G   | 0.131            | 0.445                              |
| <i>SF3A1</i>   | rs7288947  | chr22 30745221 | C/T     | T   | 0.574            | 1                                  |
| <i>SF3A1</i>   | rs8141656  | chr22 30740148 | C/T     | C   | 0.995            | 1                                  |
| <i>SF3A1</i>   | rs9608886  | chr22 30739394 | G/T     | G   | 0.541            | 1                                  |
| <i>SF3B1</i>   | rs11683572 | chr2 198289575 | C/G     | G   | 0.087            | 0.370                              |
| <i>SRSF1</i>   | rs2233911  | chr17 56083934 | A/G     | G   | 0.942            | 1                                  |
| <i>SRSF1</i>   | rs8819     | chr17 56078738 | C/T     | T   | 0.896            | 1                                  |
| <i>SRSF2</i>   | rs237059   | chr17 74730843 | C/T     | T   | 0.99             | 1                                  |

<sup>a</sup>Each *P* value was modified by FDR correction for multiple comparisons (the number of comparisons = 17)

**Supplementary Table S2: Effects of 14 tagSNPs from six RNA splicing-related genes on PC risk in the screening population**

| Gene           | SNP        | Genotypes <sup>a</sup> | Controls(N = 525) (%)        | Cases(N = 298) (%)          | OR(95%CI) <sup>b</sup> | P        | FDR-P <sup>c</sup> |
|----------------|------------|------------------------|------------------------------|-----------------------------|------------------------|----------|--------------------|
| <i>PRPF40B</i> | rs4073998  | (AA+AG)/GG             | 65(12.4)/460(87.6)           | 59(19.8)/239(80.2)          | 1.74(1.18–2.56)        | 0.005    | 0.014              |
|                | rs8626     | (GG+AG)/AA             | 71(13.5)/454(86.5)           | 78(26.2)/220(73.8)          | 2.26(1.58–3.25)        | 8.98E-06 | 1.26E-04           |
| <i>SF1</i>     | rs474707   | (TT+CT)/CC             | 320(61.0)/205(39.0)          | 178(59.7)/120(40.3)         | 0.97(0.73–1.31)        | 0.860    | 0.860              |
| <i>SF3A1</i>   | rs12484880 | (GG+TG)/TT             | 76(14.5)/449(85.5)           | 47(15.8)/251(84.2)          | 1.11(0.75–1.66)        | 0.593    | 0.692              |
|                | rs2074733  | (TT+CT)/CC             | 366(69.7)/159(30.3)          | 179(60.1)/119(39.9)         | 0.64(0.48–0.87)        | 0.004    | 0.014              |
|                | rs5753081  | CT/CC                  | 29(5.5)/496(94.5)            | 15(5.0)/283(95.0)           | 0.92(0.49–1.76)        | 0.808    | 0.860              |
|                | rs5994293  | GG/GT/TT               | 56(10.7)/200(38.1)/269(51.2) | 19(6.4)/102(34.2)/177(59.4) | 0.75(0.60–0.94)        | 0.012    | 0.028              |
|                | rs7288947  | (TT+CT)/CC             | 166(31.6)/359(68.4)          | 76(25.5)/222(74.5)          | 0.74(0.54–1.02)        | 0.067    | 0.134              |
|                | rs8141656  | (CC+CT)/TT             | 261(49.7)/264(50.3)          | 164(55.0)/134(45.0)         | 1.24(0.93–1.65)        | 0.138    | 0.193              |
|                | rs9608886  | (GG+GT)/TT             | 113(21.5)/412(78.5)          | 40(13.4)/258(86.6)          | 0.56(0.38–0.83)        | 0.004    | 0.014              |
| <i>SF3B1</i>   | rs11683572 | (GG+CG)/CC             | 222(42.3)/303(57.7)          | 108(36.2)/190(63.8)         | 0.78(0.58–1.04)        | 0.089    | 0.145              |
| <i>SRSF1</i>   | rs2233911  | (GG+AG)/AA             | 170(32.4)/355(67.6)          | 114(38.3)/184(61.7)         | 1.29(0.96–1.74)        | 0.093    | 0.145              |
|                | rs8819     | CT/CC                  | 21(4.0)/504(96.0)            | 32(10.7)/266(89.3)          | 3.08(1.73–5.49)        | 1.39E-04 | 0.001              |
| <i>SRSF2</i>   | rs237059   | CT/CC                  | 6(1.1)/519(98.9)             | 1(0.3)/297(99.7)            | 0.29(0.03–2.40)        | 0.249    | 0.317              |

<sup>a</sup>The last genotype was used as the reference for OR estimation.

<sup>b</sup>Adjusted by gender and age in the unconditional logistic regression.

<sup>c</sup>Each *P* value was modified by FDR correction for multiple comparisons.
